# Supplementary material for: Two Cases of Pancytopenia with Coombs-Negative Hemolytic Anemia after Chimeric Antigen Receptor T-Cell Therapy
Source: MDPI journal article supplement (doi:10.3390/ijms22115449), 2021-05-21
Supplement: s1 [file s1]

## Supplementary material

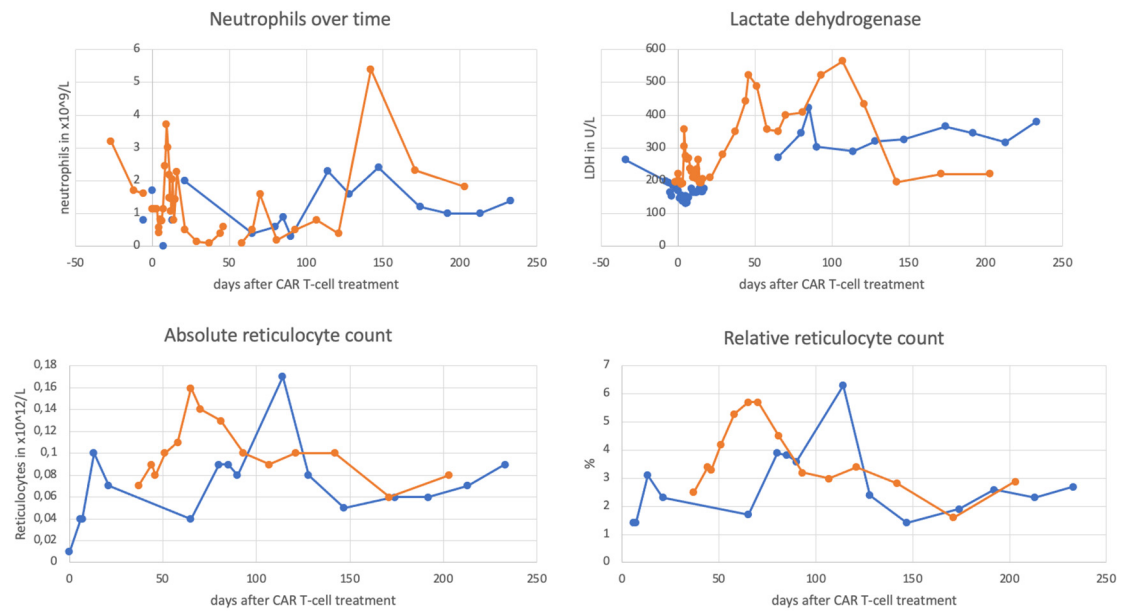

Supplementary Figure S1: Blood cell counts over time

*Blue = patient A, orange = patient B*

## Supplementary figure 2

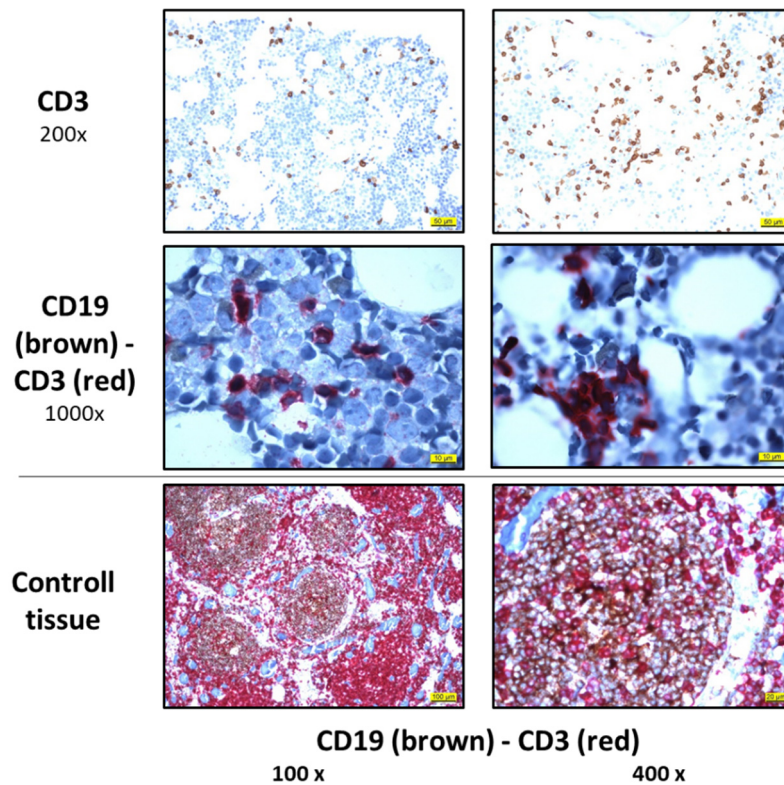

**Supplementary Figure S2:** Immunohistochemical staining of CD3 and CD19. The immunohistochemical stainings of CD3 revealed a low to moderate increase of T-cells in the interstitium of the bone marrow of both patients, whereby a double-staining of CD19 (brown) and CD3 (red) did not show any overlay. A control tissue shows the typical distribution of CD19 positive B-cells in the follicular and of CD3 positive T-cells in the interfollicular area of a reactive lymph node. Finally, CD20 and CD79a detected no abnormal B-cell

Supplementary Table S1: Lab values over time for patient A

| Days after CAR T-cell treatment | Hemoglobin (g/dL) | absolute reticulocytes (x10 <sup>12</sup> /L) | relative reticulocytes (%) | haptoglobin (mg/dL) | LDH   | Thrombocytes (x10 <sup>9</sup> /L) | Leukocytes (x10 <sup>9</sup> /L) | Neutrophils (x10 <sup>9</sup> /L) |
|---------------------------------|-------------------|-----------------------------------------------|----------------------------|---------------------|-------|------------------------------------|----------------------------------|-----------------------------------|
|                                 |                   |                                               |                            |                     | (U/L) |                                    |                                  |                                   |
| -34                             | 10,6              |                                               |                            |                     | 264   | 98                                 | 5,2                              |                                   |
| -8                              | 9,8               |                                               |                            |                     | 199   | 60                                 | 2,33                             |                                   |
| -8                              | 9,7               |                                               |                            |                     |       | 67                                 | 2,44                             |                                   |
| -6                              | 9                 |                                               |                            |                     | 194   | 52                                 | 2,5                              | 0,8                               |
| -6                              | 8,7               |                                               |                            |                     |       | 60                                 | 2,38                             |                                   |
| -5                              | 8,7               |                                               |                            |                     | 164   | 59                                 | 2,32                             |                                   |
| -4                              | 7,9               |                                               |                            |                     | 154   | 47                                 | 1,84                             |                                   |
| -3                              | 10,4              |                                               |                            |                     | 185   | 50                                 | 2,56                             |                                   |
| -2                              | 10,6              |                                               |                            |                     | 185   | 49                                 | 2,71                             |                                   |
| -1                              | 10,5              |                                               |                            |                     | 177   | 48                                 | 2,28                             |                                   |
| 0                               | 10,2              | 0,01                                          | 0,4                        |                     | 170   | 45                                 | 1,93                             | 1,7                               |
| 0                               | 10,7              |                                               |                            |                     |       | 48                                 | 1,83                             |                                   |
| 1                               | 9,4               |                                               |                            |                     | 146   | 37                                 | 2,26                             |                                   |
| 2                               | 9,8               |                                               |                            |                     | 155   | 33                                 | 3,39                             |                                   |
| 2                               | 9,8               |                                               |                            |                     |       | 34                                 | 2,6                              |                                   |
| 3                               | 9,2               |                                               |                            |                     | 137   | 28                                 | 1,31                             |                                   |
| 3                               | 9,5               |                                               |                            |                     |       | 27                                 | 0,85                             |                                   |
| 4                               | 9,1               |                                               |                            |                     | 139   | 24                                 | 0,29                             |                                   |
| 4                               | 8,5               |                                               |                            |                     |       | 23                                 | 0,27                             |                                   |
| 5                               | 8,4               |                                               |                            |                     | 130   | 20                                 | 0,27                             |                                   |
| 5                               | 7,9               |                                               |                            |                     |       | 20                                 | 0,31                             |                                   |
| 5                               | 8,1               |                                               |                            |                     | 153   | 19                                 | 0,3                              |                                   |
| 6                               | 8,6               |                                               |                            |                     |       | 21                                 | 0,33                             |                                   |
| 6                               | 8,5               | 0,04                                          | 1,4                        |                     | 133   | 20                                 | 0,33                             |                                   |
| 6                               | 7,6               |                                               |                            |                     |       | 20                                 | 0,39                             |                                   |
| 6                               | 7,7               |                                               |                            |                     |       | 21                                 | 0,55                             |                                   |
| 7                               | 8,7               |                                               |                            |                     |       | 23                                 | 0,66                             |                                   |
| 7                               | 8,8               | 0,04                                          | 1,4                        |                     | 150   | 24                                 | 0,64                             | 0                                 |
| 7                               | 7,4               |                                               |                            |                     |       | 22                                 | 0,57                             |                                   |
| 8                               | 8                 |                                               |                            |                     |       | 25                                 | 0,69                             |                                   |
| 8                               | 9,4               |                                               |                            |                     |       | 27                                 | 0,86                             |                                   |
| 9                               | 11                |                                               |                            |                     | 175   | 36                                 | 1,44                             |                                   |
| 10                              | 10,6              |                                               |                            |                     | 164   | 40                                 | 1,4                              |                                   |
| 11                              | 9,9               |                                               |                            |                     | 165   | 41                                 | 1,61                             |                                   |
| 12                              | 10                |                                               |                            |                     | 165   | 44                                 | 1,91                             |                                   |
| 13                              | 10                |                                               |                            |                     |       | 56                                 | 2,09                             |                                   |
| 13                              | 10,2              | 0,1                                           | 3,1                        |                     |       | 47                                 | 2,14                             | 0,8                               |
| 14                              | 10,1              |                                               |                            |                     | 177   | 48                                 | 2,28                             |                                   |
| 15                              | 10,1              |                                               |                            |                     | 166   | 46                                 | 2,49                             |                                   |

|     |      |      |     |    |     |    |      |     |
|-----|------|------|-----|----|-----|----|------|-----|
| 16  | 10,2 |      |     |    | 168 | 47 | 2,15 |     |
| 17  | 10,1 |      |     |    | 176 | 46 | 2,06 |     |
| 21  | 10,1 | 0,07 | 2,3 |    |     | 40 | 3,55 | 2   |
| 65  | 8,5  | 0,04 | 1,7 | 0  | 272 | 30 | 1,68 | 0,4 |
| 80  | 8,6  | 0,09 | 3,9 | 0  | 345 | 20 | 1,79 | 0,6 |
| 85  | 8,4  | 0,09 | 3,8 | 0  | 422 | 15 | 2,32 | 0,9 |
| 90  | 8,3  | 0,08 | 3,6 |    | 303 | 26 | 1,44 | 0,3 |
| 114 | 9,9  | 0,17 | 6,3 | 38 | 290 | 32 | 3,62 | 2,3 |
| 128 | 11,1 | 0,08 | 2,4 |    | 321 | 37 | 3,03 | 1,6 |
| 147 | 11,5 | 0,05 | 1,4 |    | 326 | 61 | 4,5  | 2,4 |
| 174 | 10,9 | 0,06 | 1,9 | 91 | 365 | 51 | 3,05 | 1,2 |
| 192 | 10,7 | 0,06 | 2,6 | 91 | 345 | 57 | 2,48 | 1   |
| 213 | 10,3 | 0,07 | 2,3 |    | 317 | 61 | 2,22 | 1   |
| 233 | 11,4 | 0,09 | 2,7 |    | 380 | 78 | 2,91 | 1,4 |

Supplementary Table S2: Lab values over time for patient B

| Days after CAR<br>T-cell<br>treatment | Hemoglo<br>bin<br>(g/dL) | absolute<br>reticulocytes<br>(x10 <sup>12</sup> /L) | relative<br>reticulocyte<br>s (%) | haptoglo<br>bin<br>(mg/dL) | L<br>D<br>H<br>(U<br>/L<br>) | Thromboc<br>ytes<br>(x10 <sup>9</sup> /L) | Leukocyt<br>es<br>(x10 <sup>9</sup> /L) | Neutrophil<br>es<br>(x10 <sup>9</sup> /L) |
|---------------------------------------|--------------------------|-----------------------------------------------------|-----------------------------------|----------------------------|------------------------------|-------------------------------------------|-----------------------------------------|-------------------------------------------|
|                                       |                          |                                                     |                                   |                            |                              |                                           |                                         |                                           |
| -27                                   | 13,6                     |                                                     |                                   |                            |                              | 95                                        | 4,36                                    | 3,19                                      |
| -12                                   | 13,6                     |                                                     |                                   |                            |                              | 73                                        | 2,59                                    | 1,7                                       |
| -6                                    | 12,80                    |                                                     |                                   |                            |                              | 79                                        | 2,4                                     | 1,61                                      |
| -2                                    | 12,60                    |                                                     |                                   |                            | 19<br>7                      | 70                                        | 2,2                                     |                                           |
| 0                                     | 12,80                    |                                                     |                                   |                            | 22<br>2                      | 72                                        | 1,2                                     | 1,14                                      |
| 1                                     | 12,00                    |                                                     |                                   |                            | 19<br>8                      | 57                                        | 1,2                                     | 1,15                                      |
| 2                                     | 11,30                    |                                                     |                                   |                            | 18<br>9                      | 57                                        | 1,2                                     | 1,14                                      |
| 3                                     | 10,40                    |                                                     |                                   |                            | 19<br>1                      | 55                                        | 1,3                                     | 1,14                                      |
| 4                                     | 10,60                    |                                                     |                                   |                            | 30<br>4                      | 34                                        | 0,6                                     | 0,58                                      |
| 4                                     | 9,60                     |                                                     |                                   |                            | 35<br>6                      | 35                                        | 0,5                                     | 0,41                                      |
| 5                                     | 10,20                    |                                                     |                                   |                            | 27<br>6                      | 28                                        | 0,9                                     | 0,83                                      |
| 6                                     | 10,00                    |                                                     |                                   |                            | 26<br>7                      | 30                                        | 1                                       | 0,77                                      |
| 7                                     | 10,30                    |                                                     |                                   |                            | 26<br>8                      | 29                                        | 1,8                                     | 1,13                                      |
| 8                                     | 10,70                    |                                                     |                                   |                            | 23<br>7                      | 34                                        | 3,9                                     | 2,46                                      |
| 9                                     | 10,40                    |                                                     |                                   |                            | 22<br>8                      | 44                                        | 5,8                                     | 3,71                                      |
| 10                                    | 10,50                    |                                                     |                                   |                            | 21<br>1                      | 60                                        | 4,6                                     | 3,01                                      |

|     |       |      |     |     |         |    |      |      |
|-----|-------|------|-----|-----|---------|----|------|------|
| 11  | 11,30 |      |     |     | 22<br>4 | 83 | 3,6  | 2,19 |
| 11  | 11,10 |      |     |     | 21<br>2 | 72 | 2,5  | 1,48 |
| 12  | 12,20 |      |     |     | 20<br>6 | 98 | 2,5  | 1,46 |
| 12  | 11,70 |      |     |     | 23<br>5 | 85 | 1,3  | 1,07 |
| 13  | 11,60 |      |     |     | 26<br>4 | 90 | 2,7  | 2,04 |
| 14  | 10,70 |      |     |     | 19<br>5 | 75 | 1,3  | 0,81 |
| 15  | 11,10 |      |     |     | 19<br>4 | 72 | 1,8  | 1,44 |
| 16  | 11,2  |      |     |     | 20<br>5 | 74 | 2,7  | 2,28 |
| 21  | 10,70 |      |     |     | 20<br>9 | 39 | 1,3  | 0,51 |
| 29  | 10,7  |      |     |     | 28<br>0 | 23 | 0,7  | 0,14 |
| 37  | 10,2  | 0,07 | 2,5 |     | 35<br>0 | 29 | 0,76 | 0,1  |
| 44  | 9,1   | 0,09 | 3,4 | 0   | 44<br>2 | 27 | 1,17 | 0,4  |
| 46  | 8,6   | 0,08 | 3,3 | 0   | 52<br>3 | 24 | 1,11 | 0,6  |
| 51  | 8,5   | 0,1  | 4,2 | 0   | 48<br>9 | 34 | 1,25 |      |
| 58  | 7,7   | 0,11 | 5,3 | 0   | 35<br>7 | 29 | 0,67 | 0,1  |
| 65  | 10    | 0,16 | 5,7 | 0   | 35<br>1 | 35 | 1,37 | 0,5  |
| 70  | 9,3   | 0,14 | 5,7 | 0   | 40<br>1 | 43 | 2,07 | 1,6  |
| 81  | 10,3  | 0,13 | 4,5 | 0   | 40<br>8 | 43 | 0,69 | 0,2  |
| 93  | 11,4  | 0,1  | 3,2 | 0   | 52<br>3 | 61 | 0,98 | 0,5  |
| 107 | 10,8  | 0,09 | 3   |     | 56<br>4 | 61 | 1,47 | 0,8  |
| 121 | 9,9   | 0,1  | 3,4 | 116 | 43<br>3 | 76 | 1,19 | 0,4  |
| 142 | 12,2  | 0,1  | 2,8 | 64  | 19<br>6 | 96 | 6,55 | 5,4  |
| 171 | 13,6  | 0,06 | 1,6 | 46  | 22<br>1 | 88 | 3,49 | 2,32 |
| 203 | 13,6  | 0,08 | 2,9 | 37  | 22<br>1 | 88 | 3,05 | 1,81 |
